# Supplementary material for: Molecular dynamic simulations of OH-stretching overtone induced photodissociation of fluorosulfonic and chlorosulfonic acid
Source: Royal Society of Chemistry journal article supplement (doi:10.1039/c003073m), 2010-01-01

# Supplementary Material to

**Molecular Dynamic Simulations of OH-Stretching Overtone Induced**

**Photodissociation of Fluorosulfonic and Chlorosulfonic Acid**

**Priyanka Gupta**

*Department of Chemistry, University of Otago, P.O. Box 56,  
Dunedin, New Zealand*

**Joseph R. Lane**

*Department of Chemistry, University of Waikato, Private Bag 3105,  
Hamilton, New Zealand*

**Henrik G. Kjaergaard\***

*Department of Chemistry, University of Copenhagen, Universitetsparken 5,  
DK-2100 Copenhagen Ø, Denmark*

**Table S1:** Calculated CC-VSCF frequencies (in  $\text{cm}^{-1}$ ) for the OH-stretching SOH-bending and OH-stretching OSOH-torsion combination states in  $\text{FSO}_3\text{H}$ .

| <b>OH-stretching state</b> | <b><math>\text{OH}_{\text{str}} + \text{SOH}_{\text{bend}}</math></b> | <b><math>\text{OH}_{\text{str}} + \text{OSOH}_{\text{tors}}</math></b> |
|----------------------------|-----------------------------------------------------------------------|------------------------------------------------------------------------|
| v=5                        | 18243                                                                 | 17385                                                                  |
| v=6                        | 22190                                                                 | 21331                                                                  |
| v=7                        | 26928                                                                 | 26069                                                                  |

**Table S2:** Selected geometric parameters (in Angstroms and degrees) for the dissociative transition state of FSO<sub>3</sub>H and ClSO<sub>3</sub>H.

| Parameter                | PM3    | MP2/TZP | CCSD(T)/AV(T+d)Z |
|--------------------------|--------|---------|------------------|
| <b>FSO<sub>3</sub>H</b>  |        |         |                  |
| $R_{\text{O-H}}$         | 1.3198 | 1.1709  | 1.2379           |
| $\theta_{\text{H-O-S}}$  | 91.38  | 91.96   | 84.11            |
| $\phi_{\text{H-O-S-O}}$  | 100.21 | 99.91   | 99.61            |
| $R_{\text{S-X}}$         | 1.7951 | 2.2437  | 1.9780           |
| <b>ClSO<sub>3</sub>H</b> |        |         |                  |
| $R_{\text{O-H}}$         | 1.3249 | 1.2142  | 1.2854           |
| $\theta_{\text{H-O-S}}$  | 103.05 | 98.36   | 89.13            |
| $\phi_{\text{H-O-S-O}}$  | 98.14  | 100.26  | 101.18           |
| $R_{\text{S-X}}$         | 2.5164 | 2.8835  | 2.4146           |

**Table S3:** Harmonic frequencies (in  $\text{cm}^{-1}$ ) for the dissociative transition state of  $\text{FSO}_3\text{H}$  and  $\text{ClSO}_3\text{H}$ .

| Mode                     | PM3   | MP2/TZP | CCSD(T)/AV(D+d)Z |
|--------------------------|-------|---------|------------------|
| <b>FSO<sub>3</sub>H</b>  |       |         |                  |
| 1                        | 1408  | 2044    | 1951             |
| 2                        | 1051  | 1452    | 1393             |
| 3                        | 942   | 1260    | 1228             |
| 4                        | 806   | 999     | 958              |
| 5                        | 793   | 991     | 944              |
| 6                        | 651   | 701     | 686              |
| 7                        | 553   | 630     | 607              |
| 8                        | 402   | 467     | 483              |
| 9                        | 359   | 449     | 458              |
| 10                       | 343   | 326     | 331              |
| 11                       | 219   | 215     | 219              |
| 12                       | 2306i | 1478i   | 1565i            |
| <b>ClSO<sub>3</sub>H</b> |       |         |                  |
| 1                        | 1688  | 2219    | 1603             |
| 2                        | 1134  | 1373    | 1374             |
| 3                        | 968   | 1124    | 1217             |
| 4                        | 701   | 1010    | 946              |
| 5                        | 696   | 958     | 749              |
| 6                        | 507   | 692     | 569              |
| 7                        | 394   | 536     | 500              |
| 8                        | 373   | 445     | 445              |
| 9                        | 350   | 391     | 441              |
| 10                       | 137   | 307     | 221              |
| 11                       | 127   | 256     | 167              |
| 12                       | 1917i | 1857i   | 1533i            |

**Table S4:** Selected geometric parameters (in Angstroms and degrees) for the hydrogen-hopping transition state of FSO<sub>3</sub>H and ClSO<sub>3</sub>H.

| Parameter                | PM3    | MP2/TZP | CCSD(T)/AV(T+d)Z |
|--------------------------|--------|---------|------------------|
| <b>FSO<sub>3</sub>H</b>  |        |         |                  |
| $R_{\text{O-H}}$         | 1.3518 | 1.2942  | 1.2976           |
| $\theta_{\text{H-O-S}}$  | 85.37  | 73.38   | 73.39            |
| $\phi_{\text{H-O-S-O}}$  | 130.14 | 134.60  | 132.99           |
| $R_{\text{S-X}}$         | 1.5405 | 1.6017  | 1.54847          |
| <b>ClSO<sub>3</sub>H</b> |        |         |                  |
| $R_{\text{O-H}}$         | 1.3689 | 1.2969  | 1.2933           |
| $\theta_{\text{H-O-S}}$  | 85.99  | 73.64   | 73.70            |
| $\phi_{\text{H-O-S-O}}$  | 129.26 | 129.51  | 129.38           |
| $R_{\text{S-X}}$         | 2.0664 | 2.0567  | 2.0104           |

**Table S5:** Harmonic frequencies (in  $\text{cm}^{-1}$ ) for the hydrogen-hopping transition state of  $\text{FSO}_3\text{H}$  and  $\text{ClSO}_3\text{H}$ .

| Mode                                      | PM3   | MP2/TZP | CCSD(T)/AV(D+d)Z |
|-------------------------------------------|-------|---------|------------------|
| <b><math>\text{FSO}_3\text{H}</math></b>  |       |         |                  |
| 1                                         | 1152  | 2231    | 2138             |
| 2                                         | 946   | 1410    | 1351             |
| 3                                         | 873   | 1164    | 1119             |
| 4                                         | 808   | 1039    | 1004             |
| 5                                         | 750   | 971     | 938              |
| 6                                         | 640   | 780     | 791              |
| 7                                         | 456   | 676     | 654              |
| 8                                         | 391   | 493     | 498              |
| 9                                         | 353   | 463     | 470              |
| 10                                        | 295   | 412     | 402              |
| 11                                        | 252   | 307     | 310              |
| 12                                        | 2443i | 1874i   | 1928i            |
| <b><math>\text{ClSO}_3\text{H}</math></b> |       |         |                  |
| 1                                         | 1110  | 2219    | 2123             |
| 2                                         | 931   | 1373    | 1319             |
| 3                                         | 846   | 1124    | 1077             |
| 4                                         | 803   | 1010    | 970              |
| 5                                         | 720   | 958     | 931              |
| 6                                         | 518   | 692     | 669              |
| 7                                         | 450   | 536     | 531              |
| 8                                         | 366   | 445     | 452              |
| 9                                         | 344   | 391     | 387              |
| 10                                        | 248   | 307     | 300              |
| 11                                        | 225   | 256     | 258              |
| 12                                        | 2278i | 1857i   | 1920i            |

**Figure S1:** PM3 snapshots of the dissociation of FSO<sub>3</sub>H. The simulation is evaluated after excitation to the  $\nu = 5$  OH+SOH combination state.

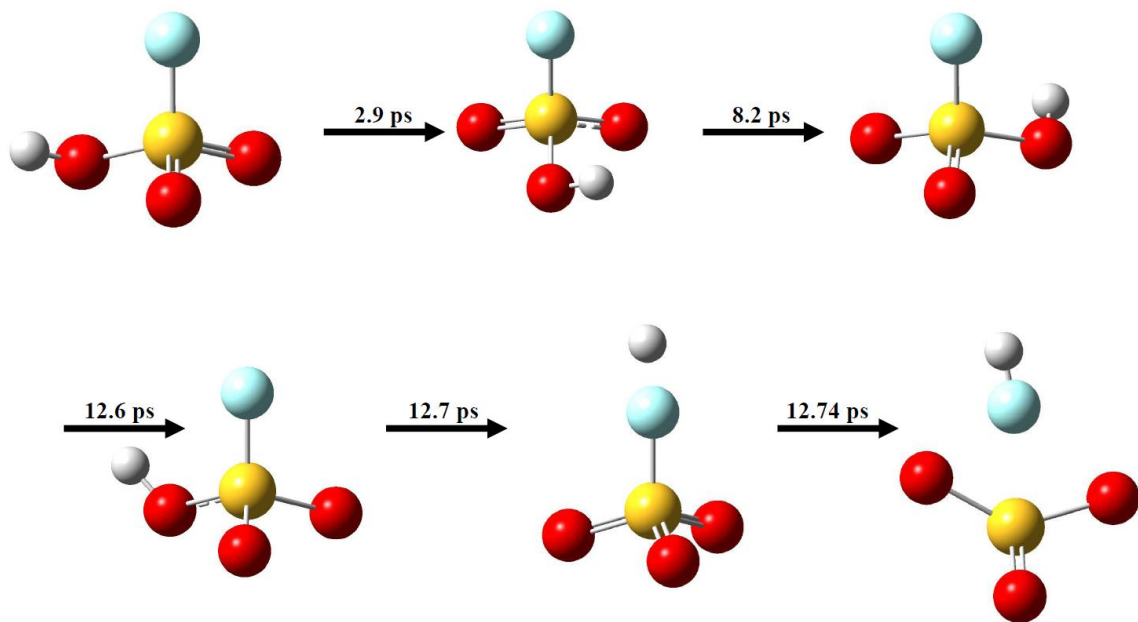

**Figure S2:** PM3 snapshots of the dissociation of FSO<sub>3</sub>H. The simulation is evaluated after excitation to the  $\nu = 5$  OH+OSOH combination state.

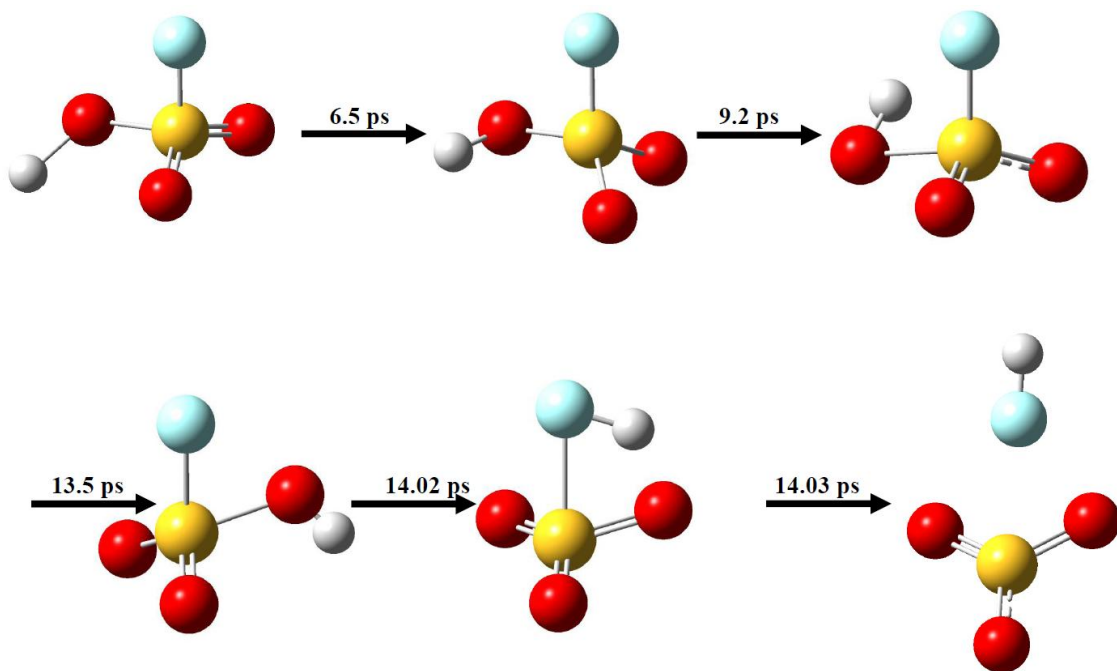



**Figure S3:** PM3 snapshots of hydrogen-hopping in FSO<sub>3</sub>H. The simulation is evaluated after excitation to the  $\nu = 5$  OH+SOH combination state.

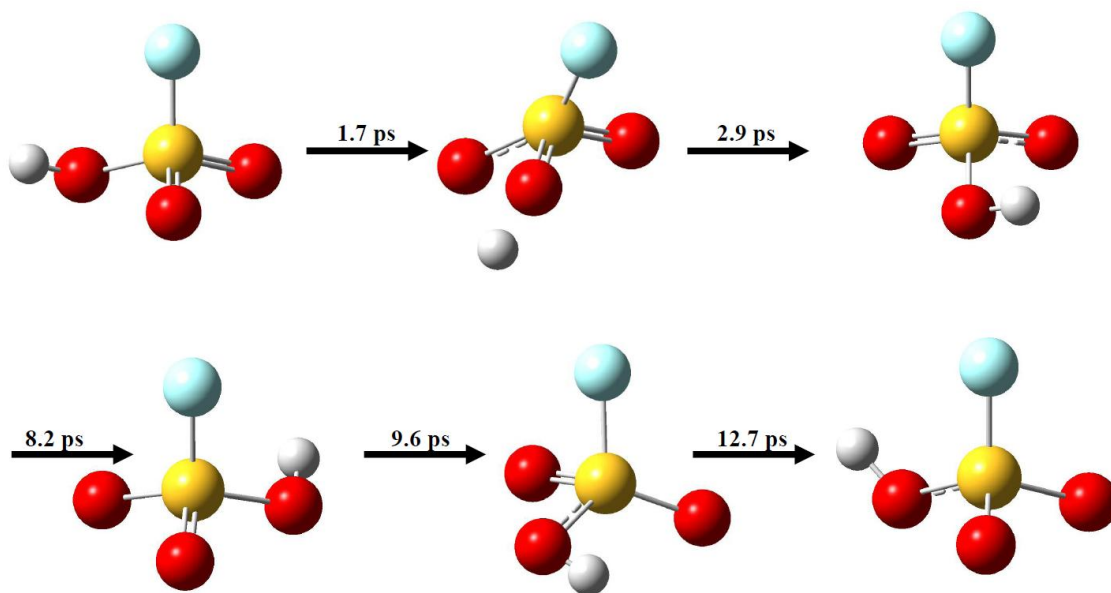

**Figure S4:** PM3 snapshots of hydrogen-hopping in FSO<sub>3</sub>H. The simulation is evaluated after excitation to the  $\nu = 5$  OH+OSOH combination state.

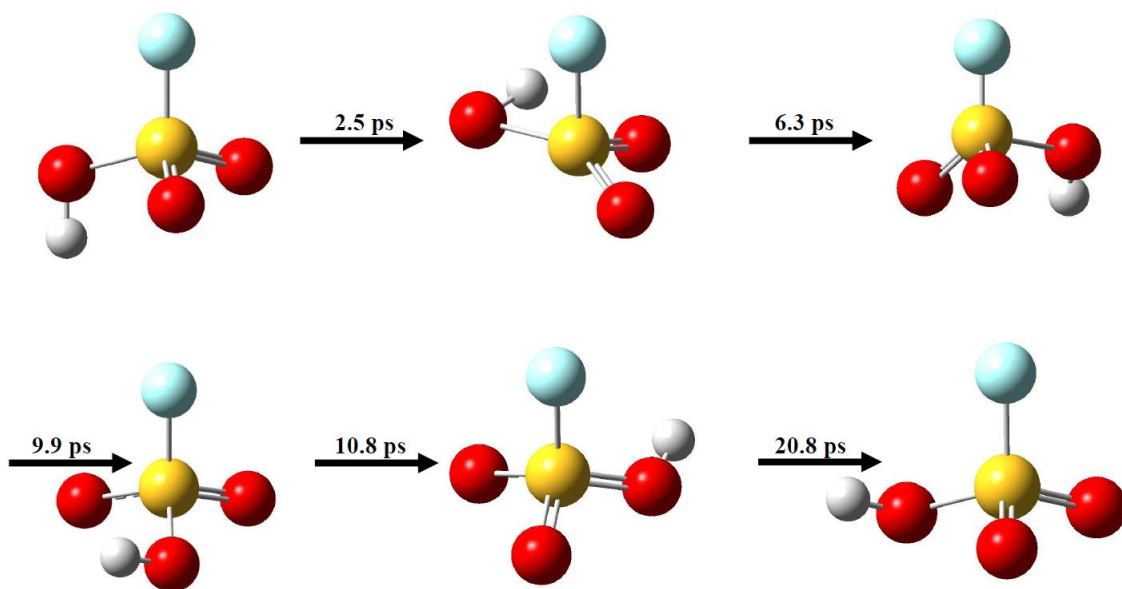

**Figure S5:** The time distribution of dissociation events for the PM3  $v = 5$  OH+SOH and OH+OSOH combination state trajectories of FSO<sub>3</sub>H.

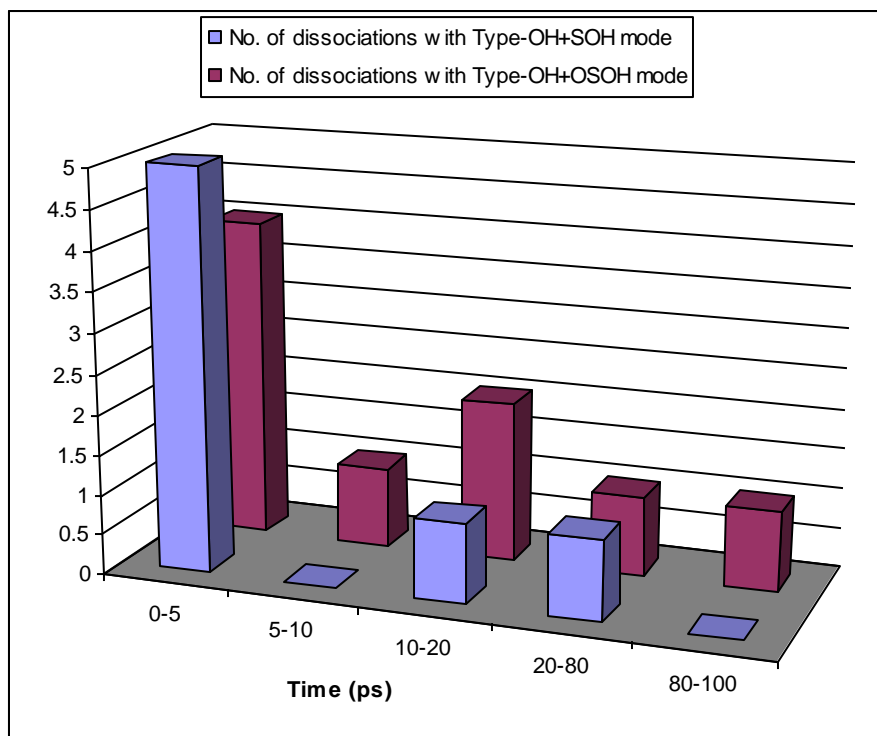

**Figure S6:** The time distribution of dissociation events for the PM3  $v = 6$  OH+SOH and OH+OSOH combination state trajectories of FSO<sub>3</sub>H.

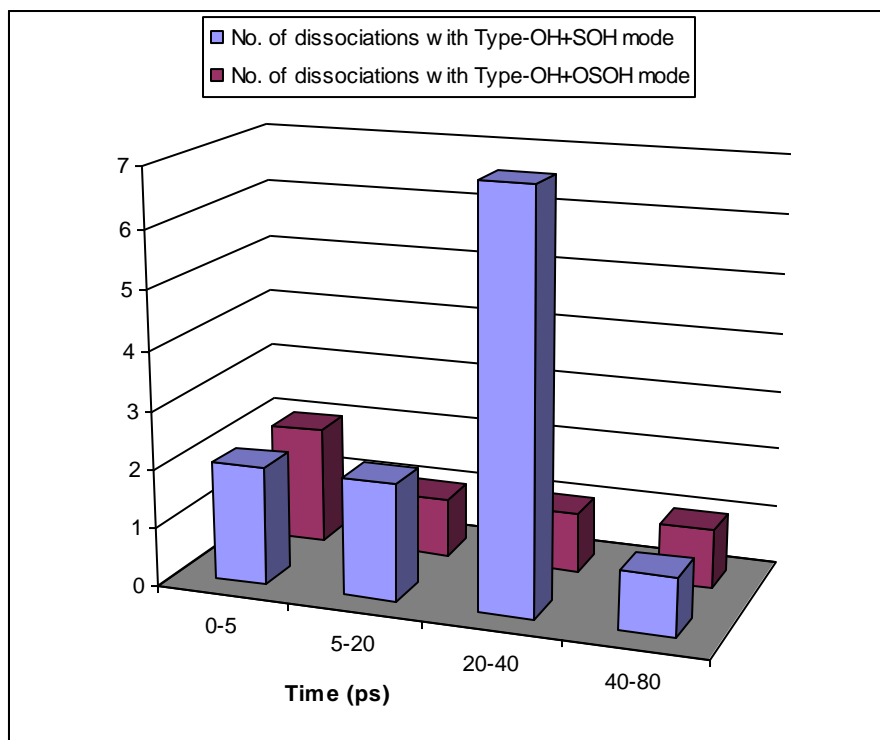

**Figure S7:** The time distribution of dissociation events for the PM3  $v = 7$  OH+SOH and OH+OSOH combination state trajectories of FSO<sub>3</sub>H.

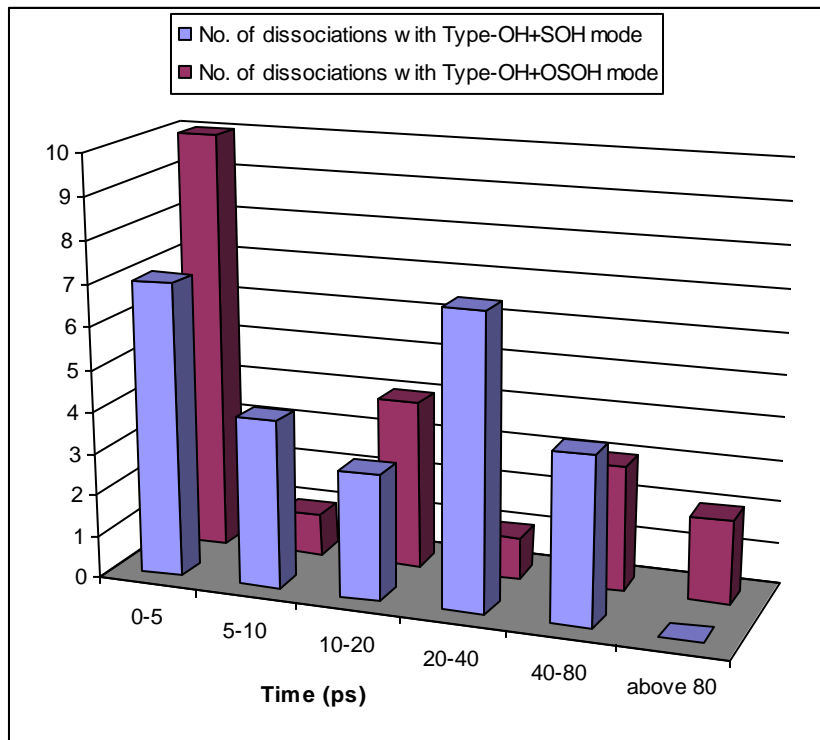

**Figure S8:** The time distribution of dissociation events for the MP2/TZP  $\nu=5$ ,  $\nu=6$  and  $\nu=7$  OH-stretching trajectories of  $\text{FSO}_3\text{H}$ .

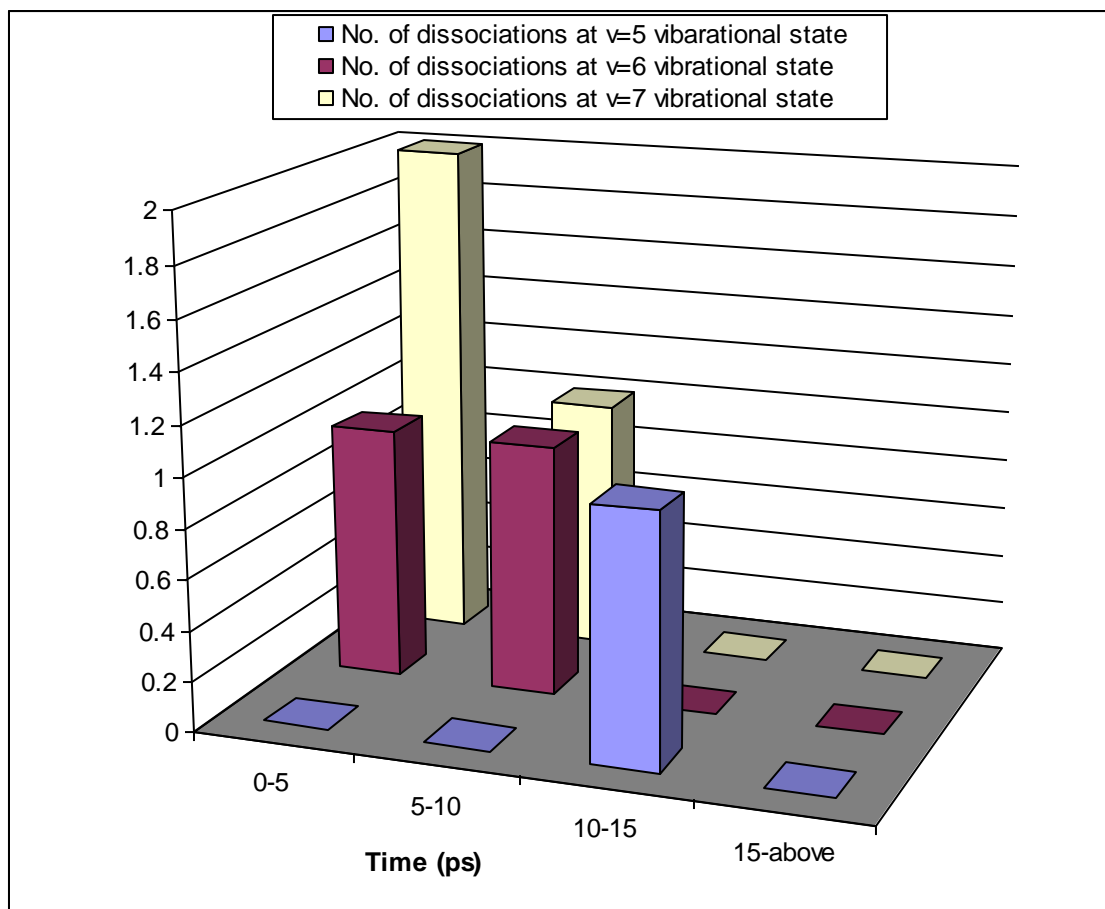

**Figure S9:** The time distribution of dissociation events for the PM3  $v=4$ ,  $v=5$  and  $v=6$  OH-stretching trajectories of  $\text{ClSO}_3\text{H}$ .

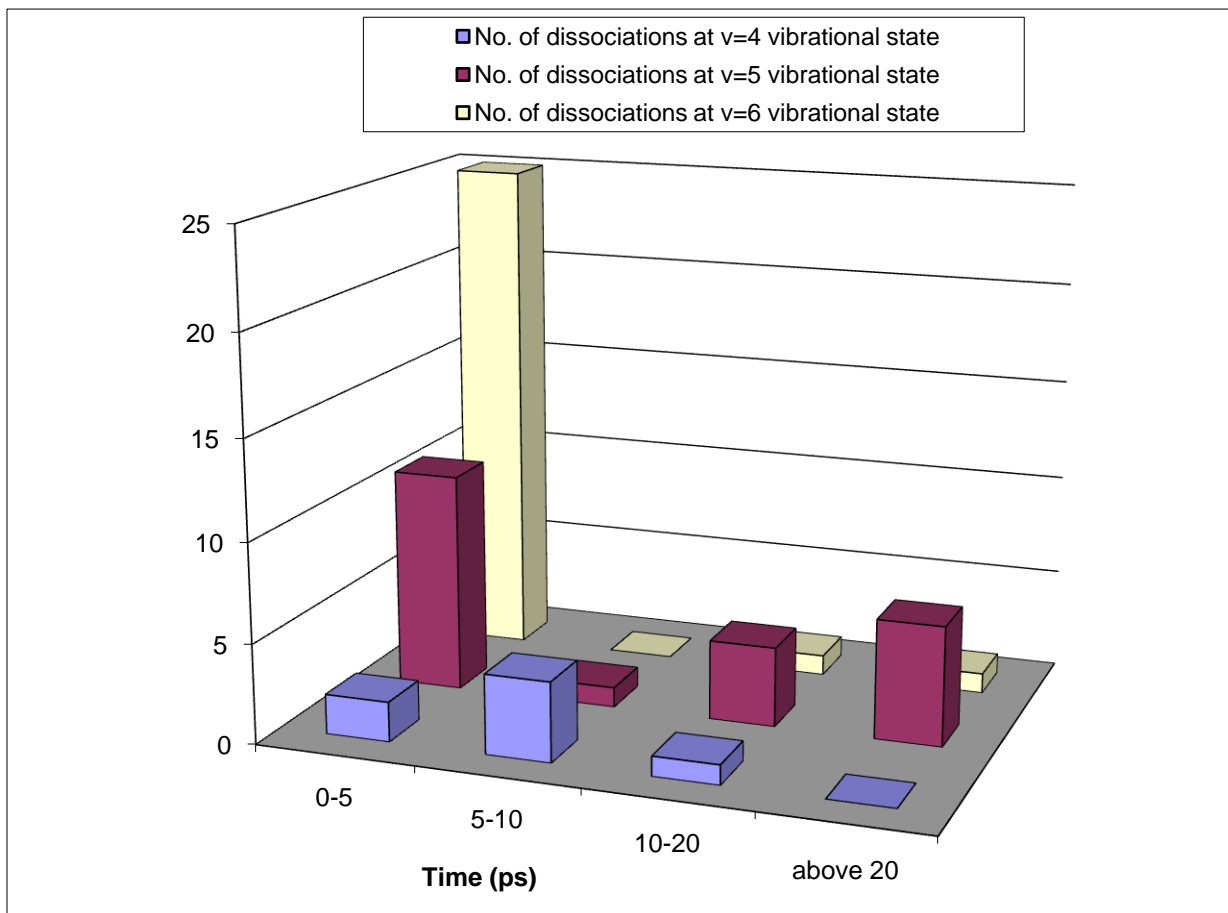

**Figure S10:** The time distribution of dissociation events for the MP2/TZP  $\nu=4$ ,  $\nu=5$  and  $\nu=6$  OH-stretching trajectories of  $\text{ClSO}_3\text{H}$ .

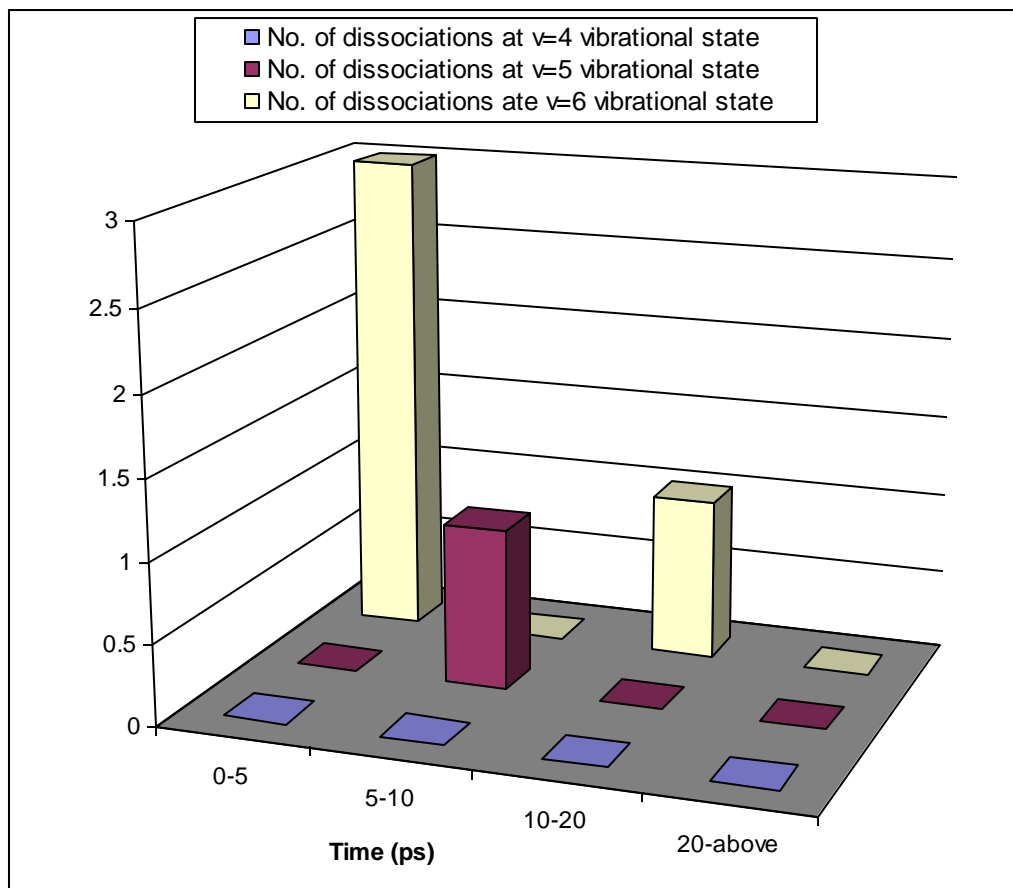



**Figure S11:** The time distribution of the first hydrogen-hopping event exhibited in PM3 trajectories for the  $\nu = 5$ ,  $\nu = 6$  and  $\nu = 7$  OH-stretching states of  $\text{FSO}_3\text{H}$ .

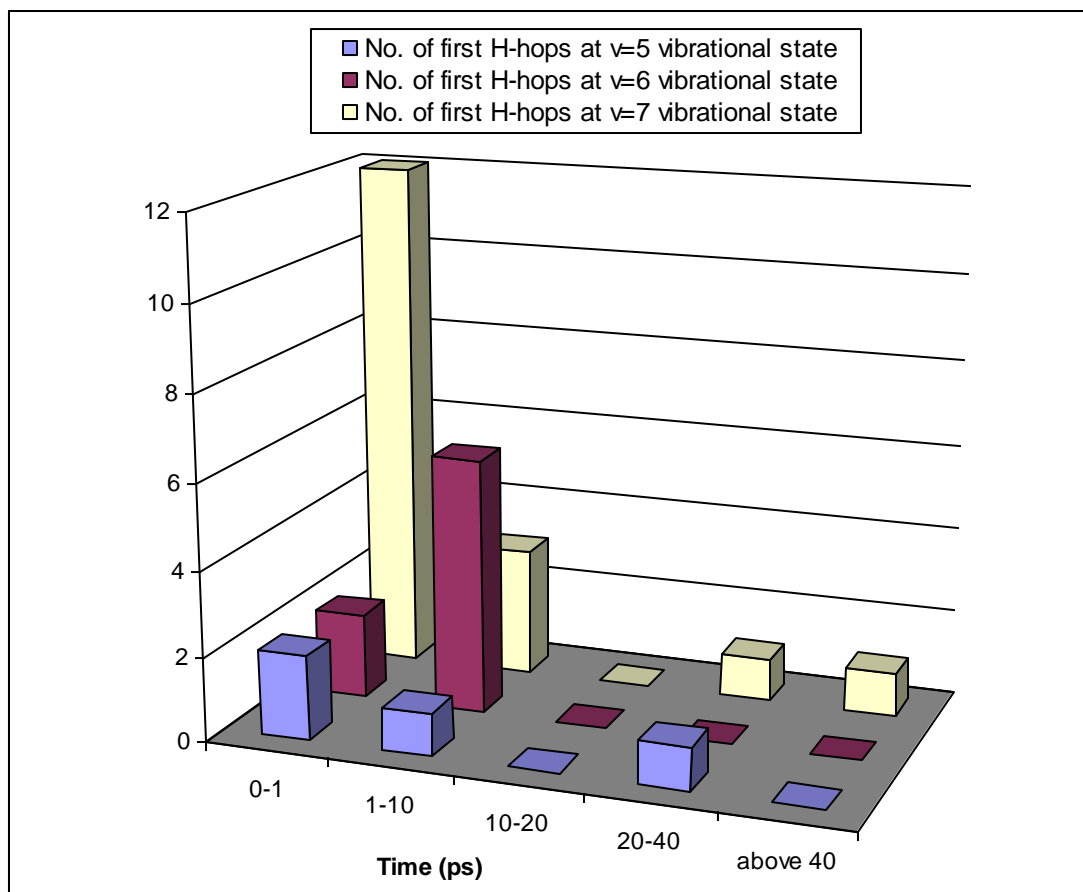

**Figure S12:** The time distribution of the first hydrogen-hopping event exhibited in PM3 trajectories for the  $v = 5$  OH+SOH and OH+OSOH combination states of FSO<sub>3</sub>H.

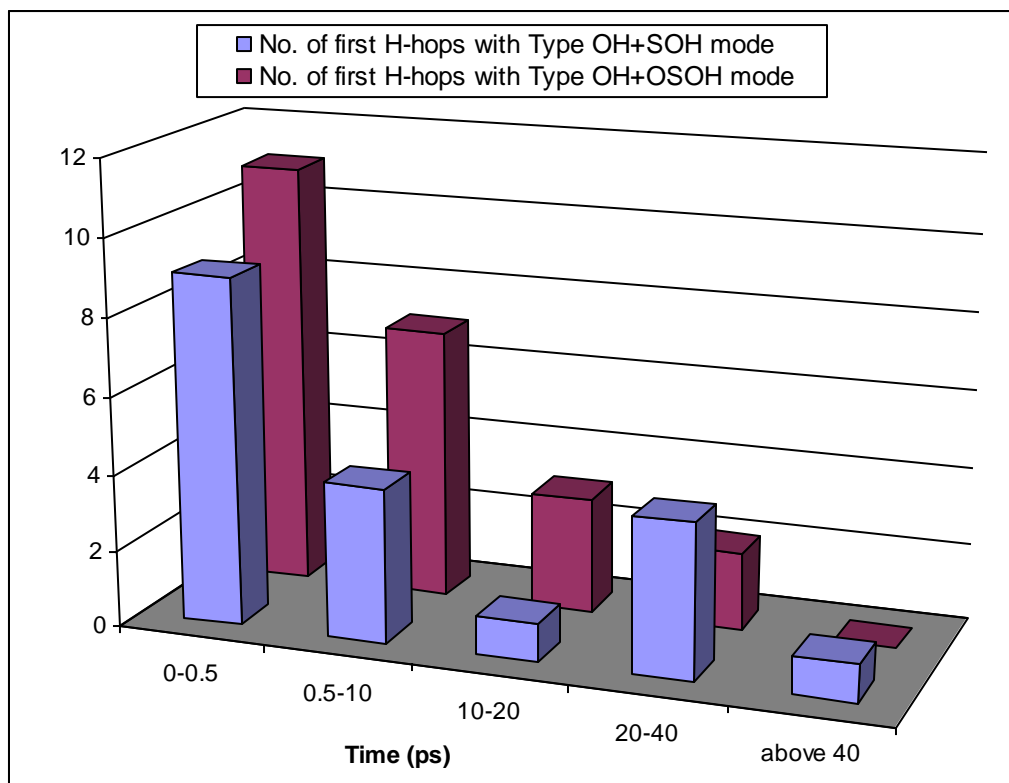

**Figure S13:** The time distribution of the first hydrogen-hopping event exhibited in PM3 trajectories for the  $v = 6$  OH+SOH and OH+OSOH combination states of FSO<sub>3</sub>H.

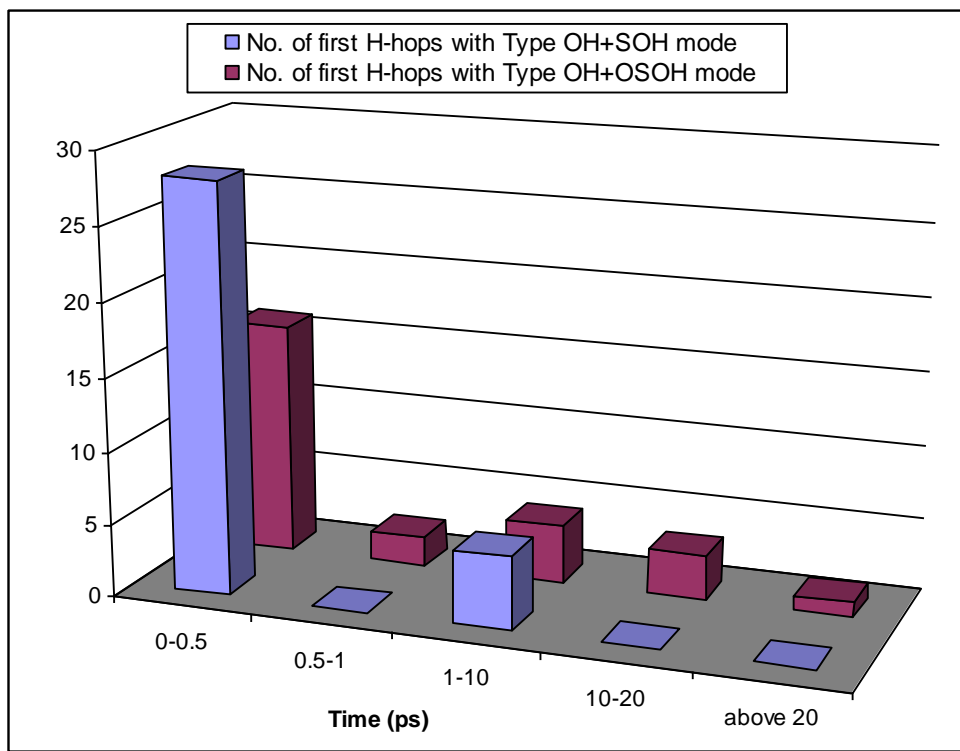

**Figure S14:** The time distribution of the first hydrogen-hopping event exhibited in PM3 trajectories for the  $v = 7$  OH+SOH and OH+OSOH combination states of FSO<sub>3</sub>H.

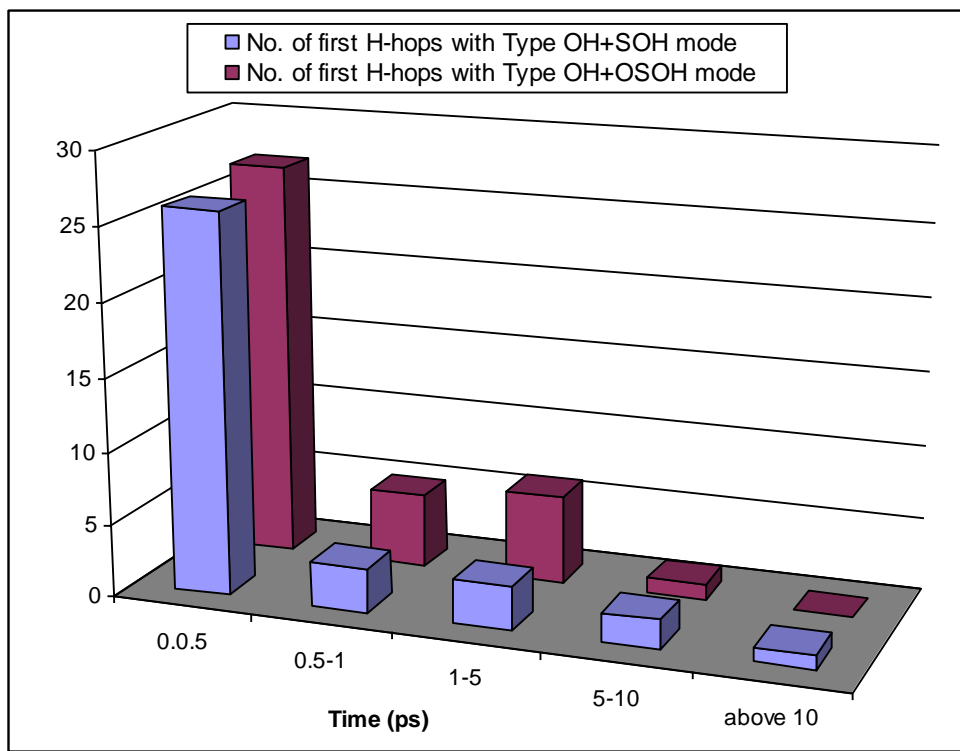

**Figure S15:** The time distribution of the first hydrogen-hopping event exhibited in MP2/TZP trajectories for the  $\nu = 5$ ,  $\nu = 6$  and  $\nu = 7$  OH-stretching states of FSO<sub>3</sub>H.

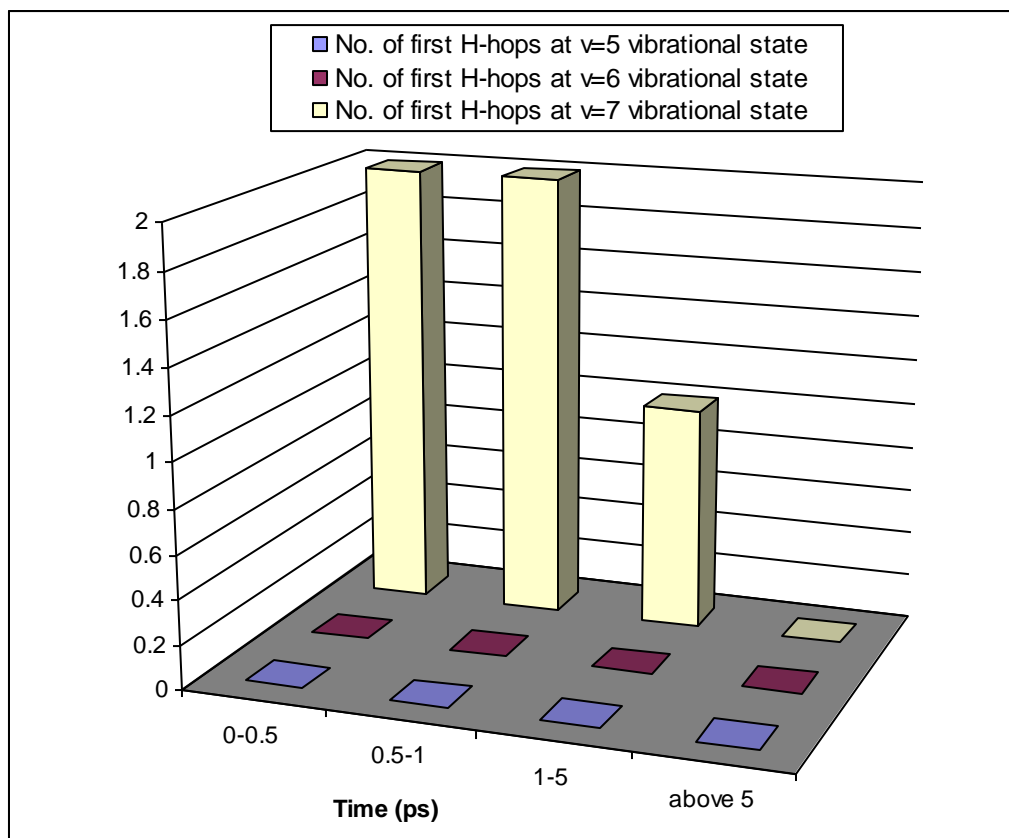

**Figure S16:** The time distribution of the first hydrogen-hopping event exhibited in PM3 trajectories for the  $\nu = 4$ ,  $\nu = 5$  and  $\nu = 6$  OH-stretching states of  $\text{ClSO}_3\text{H}$ .

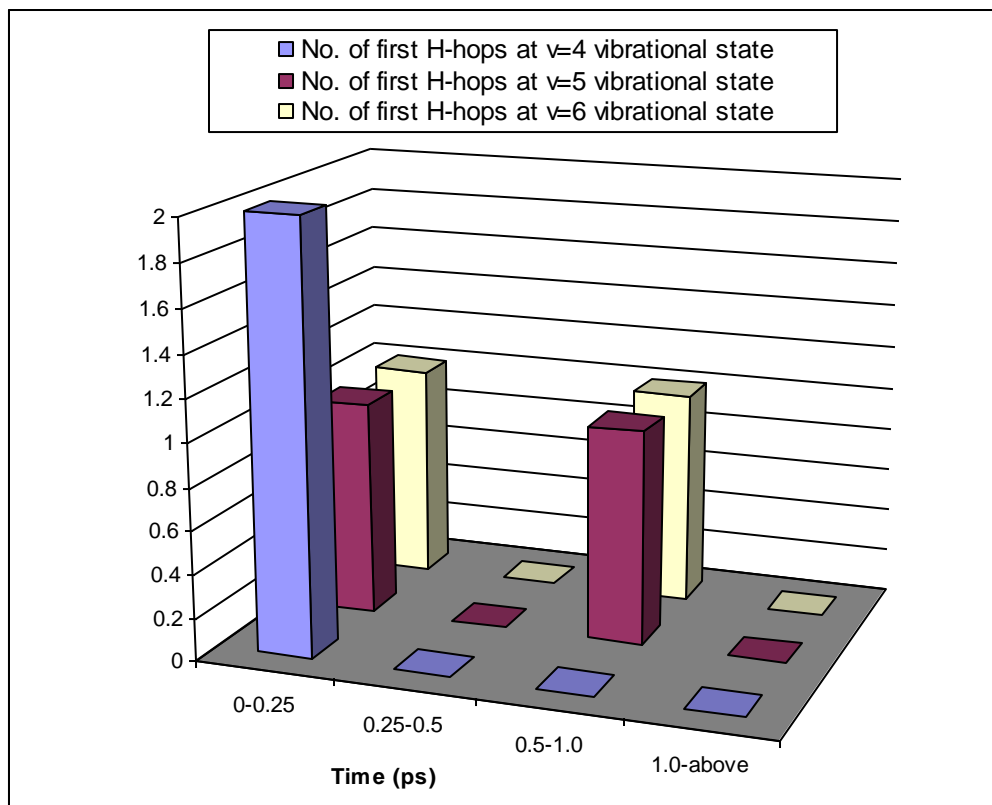

**Figure S17:** The time distribution of the first hydrogen-hopping event exhibited in MP2/TZP trajectories for the  $\nu = 4$ ,  $\nu = 5$  and  $\nu = 6$  OH-stretching states of  $\text{ClSO}_3\text{H}$ .

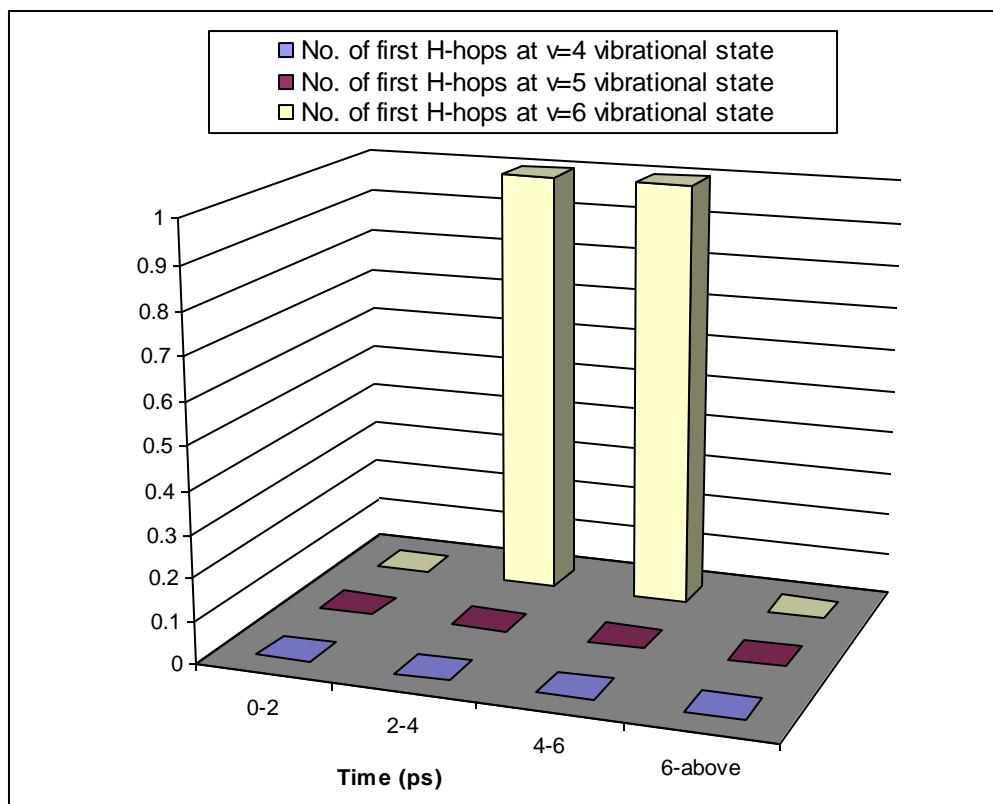

Supplement: c003073m.pdf [file c003073m.pdf]
